# Supplementary material
Source: ML conference proceedings conference paper supplement (https://openaccess.thecvf.com/content/WACV2023/html/Taherkhani_Controllable_3D_Generative_WACV_2023_paper.html)
Supplement: Supplementary file 1 [file Taherkhani_Controllable_3D_Generative_WACV_2023_supplemental.zip]

Archive with 2 entries (2 files):
- supp-1651/Supp-1651.pdf
- supp-1651/WACV23_1651_video.mp4
